# Supplementary material for: Multi-MXene assisted large-scale manufacturing of electrochemical biosensors based on enzyme-nanoflower enhanced electrodes for the detection of H2O2 secreted from live cancer cells
Source: Royal Society of Chemistry journal article supplement (doi:10.1039/d4nr01328j), 2024-01-01
Supplement: d4nr01328j1.pdf [file d4nr01328j1.pdf]

## Supporting Information

Multi-MXene assisted large-scale manufacturing of electrochemical biosensor based on enzyme-nanoflowers enhanced electrodes for detection of H<sub>2</sub>O<sub>2</sub> secreted from live cancer cells

*Wenwu Wang,<sup>a</sup> Zeyu Ma,<sup>a</sup> Qi Shao,<sup>a</sup> Jiangwang Wang,<sup>a</sup> Leixin Wu,<sup>a</sup> Xiyao Huang,<sup>a</sup> Zilu Hu,<sup>a</sup> Nan Jiang,<sup>b, c</sup> Jun Dai,<sup>d</sup> Liang He<sup>a, e, f\*</sup>*

<sup>a</sup> School of Mechanical Engineering, State Key Laboratory of Intelligent Construction and Healthy Operation and Maintenance of Deep Underground Engineering, Sichuan University, Chengdu 610065, P. R. China

<sup>b</sup> West China School of Basic Medical Sciences & Forensic Medicine, Sichuan University, Chengdu 610041, P. R. China

<sup>c</sup> Jinfeng Laboratory, Chongqing 401329, P. R. China

<sup>d</sup> School of Mechatronical Engineering, Beijing Institute of Technology, Beijing 100081, P. R. China

<sup>e</sup> Med+X Center for Manufacturing, West China Hospital, Sichuan University, Chengdu 610041, P. R. China

<sup>f</sup> Yibin Industrial Technology Research Institute of Sichuan University, Yibin R&D Park of Sichuan University, Yibin 644005, P. R. China

\* Corresponding author, E-mail: hel20@scu.edu.cn

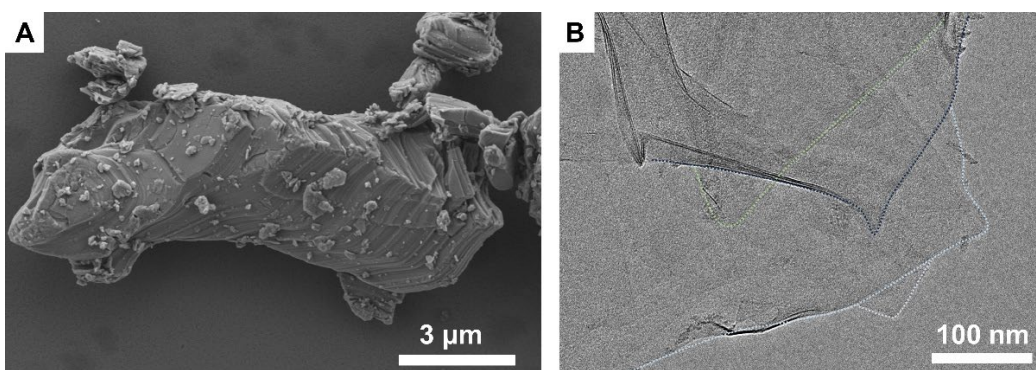

Fig. S1. SEM image of un-etched MAX phase (A) and TEM image of s-MXene after etching (B). These delaminated nanosheets appear transparent to the electron beam, underlining their ultrathin nature.

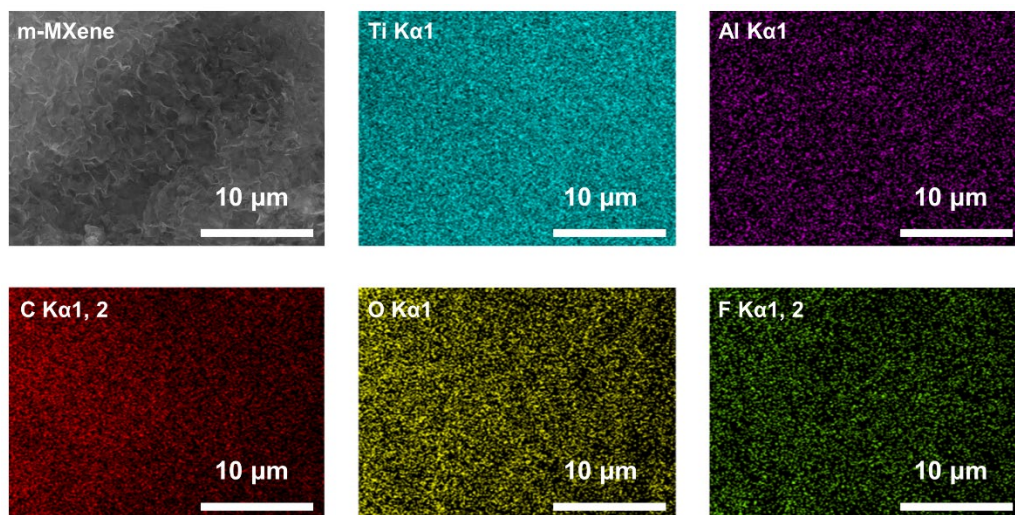

Fig. S2. Elemental distribution mappings of m-MXene nanosheets by energy dispersion spectrometer (EDS).

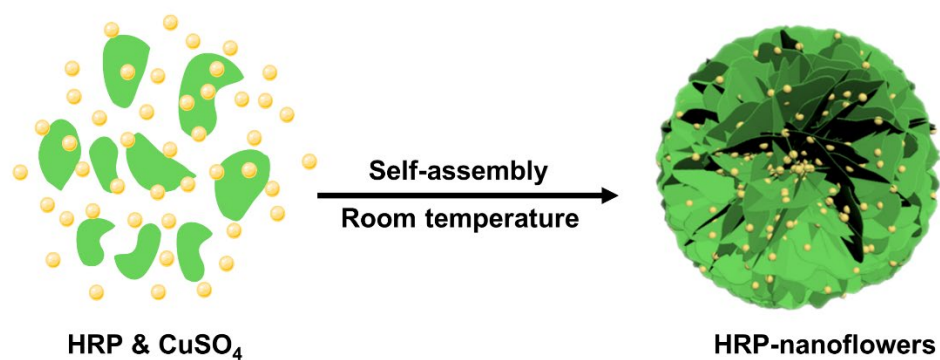

Fig. S3. Schematic diagram of the self-assembly process of HRP nanoflowers.

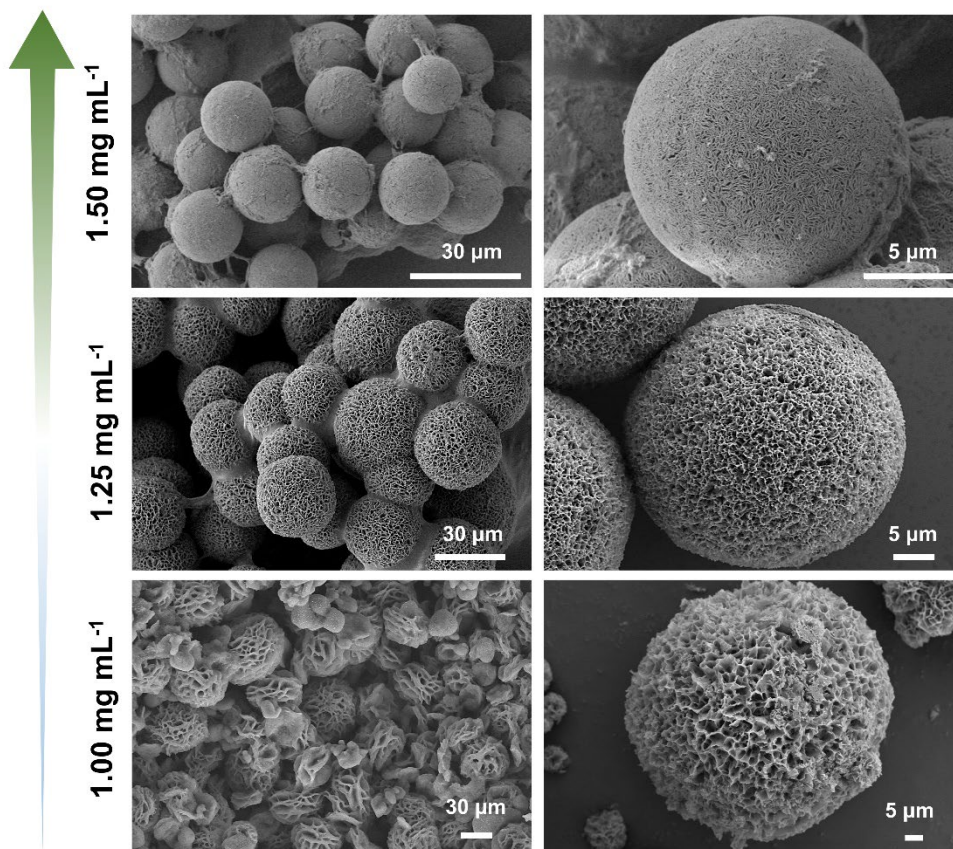

Fig. S4. SEM images of HRP nanoflowers with different morphologies and dimensions under different concentrations of HRP.

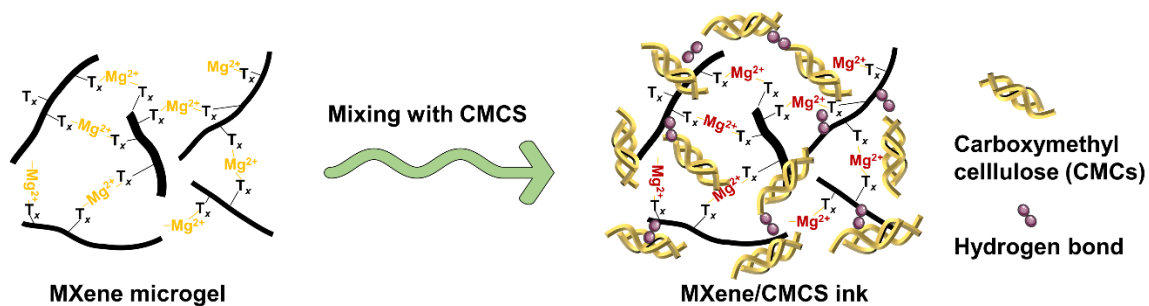

Fig. S5. Schematic diagram of preparation of the MXene-based ink.

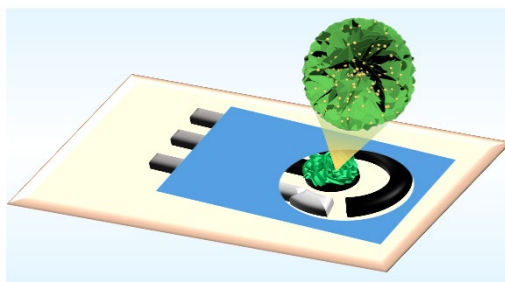

Fig. S6. Schematic diagram of electrochemical biosensors with work electrode modified by HRP nanoflowers.

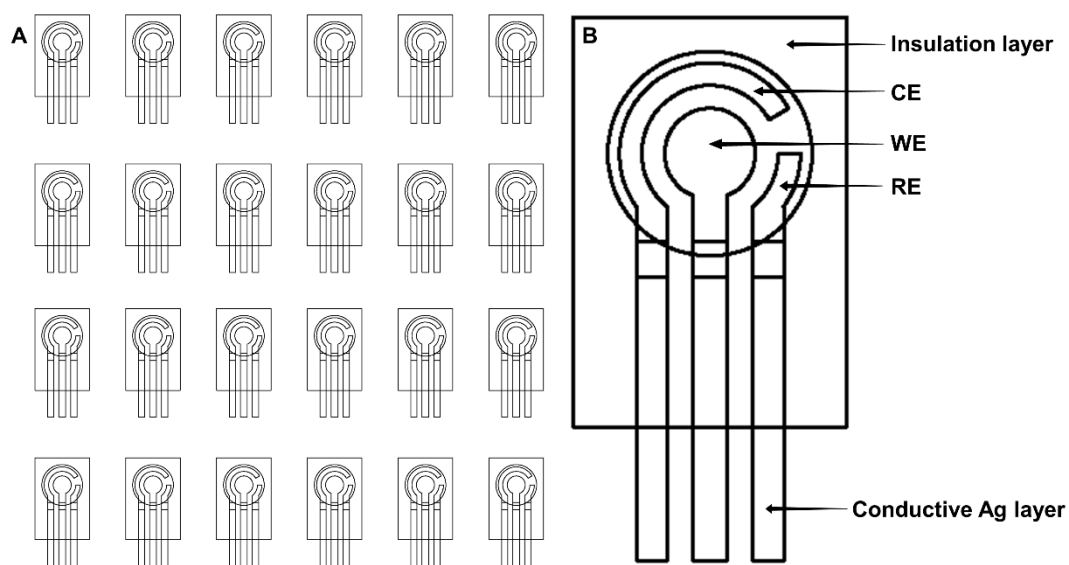

Fig. S7. A set of designed Nylon mesh boards of three-electrode system employed in screen-printing procedures (A) and configuration of individual MXene-based electrode (B).

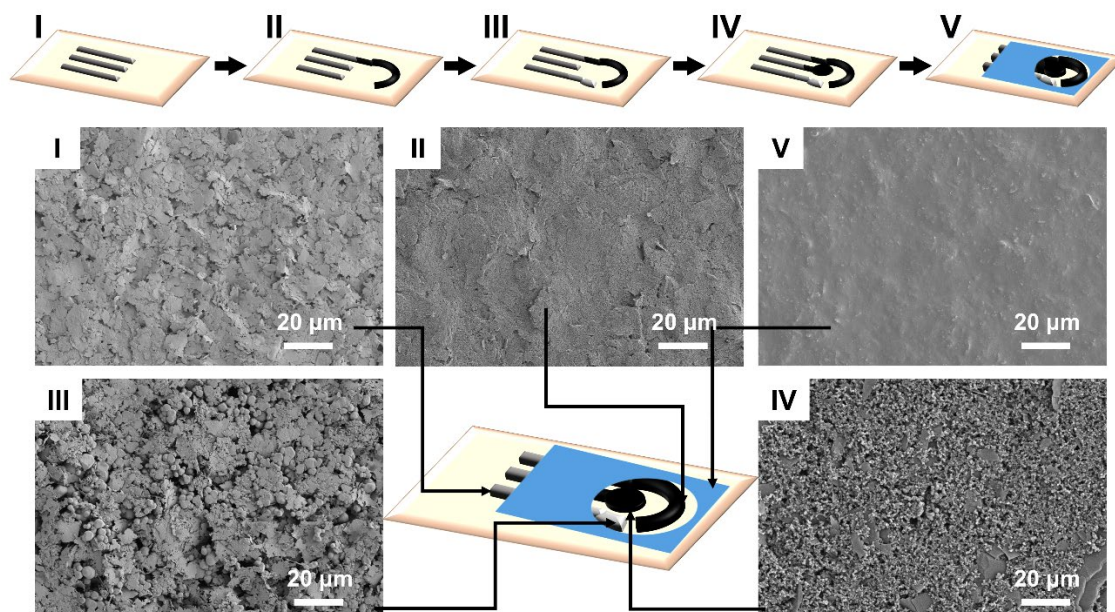

Fig. S8. Scheme of the screen-printing procedures and corresponding SEM images of the Ag ink (I), graphite ink (II), Ag/AgCl ink (III), MXene/CMCS ink (IV) and insulation ink (V) printed on PET.

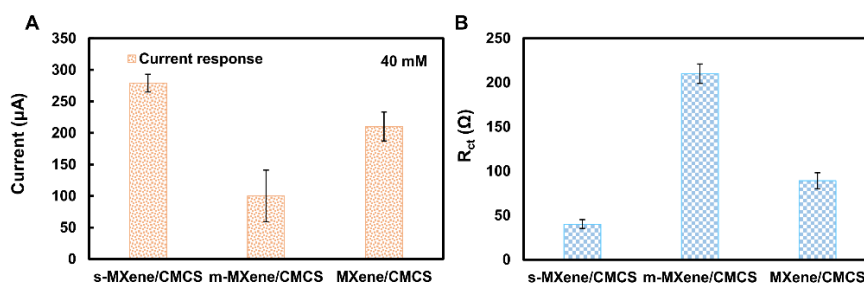

Fig. S9. Comparison of the current response (A) and impedance (B) of the sensing electrodes when employed as an H<sub>2</sub>O<sub>2</sub> electrochemical biosensor.

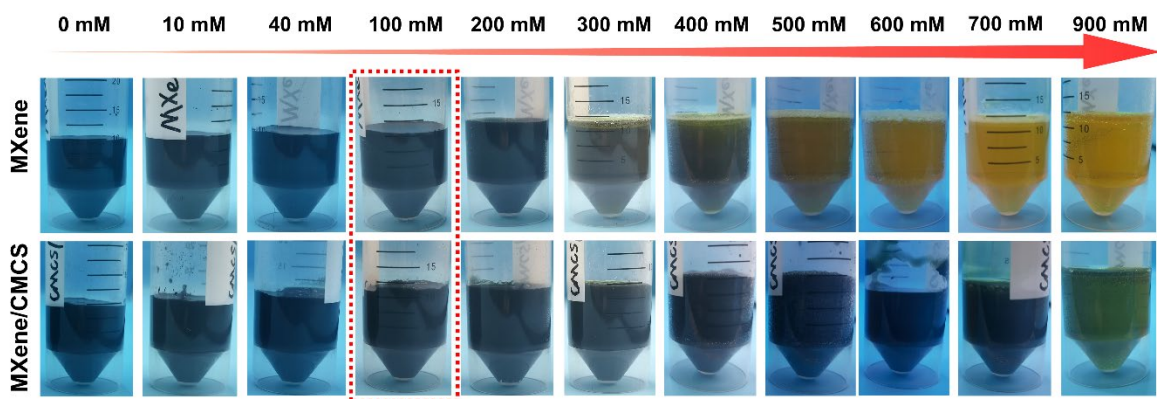

Fig. S10. CMCS mitigated the MXene degradation in  $\text{H}_2\text{O}_2$  solution and protected the MXene from oxidation.

The s-MXene disperser ( $5 \text{ mg mL}^{-1}$ ) was oxidized (the production of bubbles) when containing 100 mM of  $\text{H}_2\text{O}_2$ . Continuously increasing the concentration of  $\text{H}_2\text{O}_2$  (300 mM), the black color of solution became brown gradually, indicating an obvious oxidation of MXene. In contrast, MXene/CMCS exhibited an enhanced antioxidant capacity when utilized for the detection of cell secretion of  $\text{H}_2\text{O}_2$ .

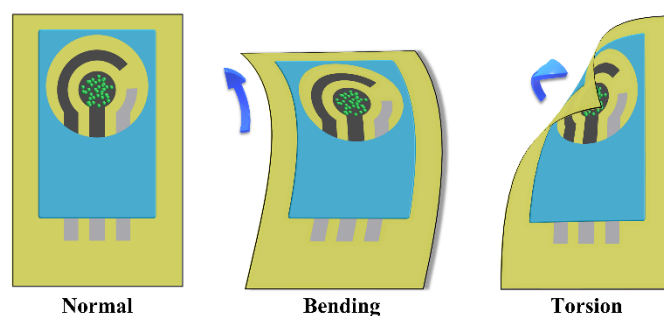

Fig. S11. Schematic view of the current response stability at different states including normal, bending and torsion.

Table S1. A summary of different biosensors for H<sub>2</sub>O<sub>2</sub> detection.

| Electroactive material Base                                       | Methods          | Linearity ( $\mu\text{M}$ ) | Sensitivity ( $\mu\text{A mM}^{-1} \text{cm}^{-2}$ ) | LOD ( $\mu\text{M}$ ) | References |
|-------------------------------------------------------------------|------------------|-----------------------------|------------------------------------------------------|-----------------------|------------|
| Anti-CEA/AuNPs/PB-MXene/ITO                                       | Electrochemistry | 1-500                       | /                                                    | 0.57                  | 1          |
| G/PtAuNC-C6 <sub>H18</sub> 16 Paper                               | Electrochemistry | 50-10000                    | 32.3                                                 | 0.6                   | 2          |
| Cells/GelMA/CNF/MNO <sub>2</sub> NW/AuNPs/GCE                     | Electrochemistry | 5-100                       | /                                                    | 0.02                  | 3          |
| NBP-CNW-NTAs/CF/Pt                                                | Electrochemistry | 1-15920                     | 61.8                                                 | 0.50                  | 4          |
| AuNFs/(PEI/PAA) <sub>10</sub> /GR/GCE                             | Electrochemistry | 5-5000                      | 507.5                                                | 4.5                   | 5          |
| AuNFs/Fe <sub>3</sub> O <sub>4</sub> -ZIF-8-MoS <sub>2</sub> /GCE | Electrochemistry | 5-120000                    | /                                                    | 0.9                   | 6          |
| CS/CuO/BP/GCE                                                     | Electrochemistry | 0.2-99.8                    | 138.0                                                | 0.112                 | 7          |
| rGO/AuNPs/ITO-PET                                                 | Electrochemistry | 25-3000                     | 64.1                                                 | 6.55                  | 8          |
| PtNP/rGO-CNT/ PtNP/SPCE                                           | Electrochemistry | 25-1000                     | 206                                                  | 4.3                   | 9          |
| AuNPs-rGO/ITO-PET                                                 | Electrochemistry | 25-5000                     | 64                                                   | 6.55                  | 10         |
| AgNPs/GCE                                                         | Electrochemistry | 1-300                       | /                                                    | 0.5                   | 11         |
| CuFeS <sub>2</sub>                                                | Fluorescence     | 50-90000                    | /                                                    | 22                    | 12         |
| ox-BNS                                                            | Fluorescence     | 0-10                        | /                                                    | 0.1                   | 13         |
| GPF-mGOx@MOF                                                      | Fluorescence     | 200-11000                   | /                                                    | 9                     | 14         |
| GDY QDs                                                           | Colorimetric     | 0.5-10                      | /                                                    | 0.13                  | 15         |
| HFPQ@ALB                                                          | Colorimetric     | 0-50                        | /                                                    | 3.5                   | 16         |
| Ni <sub>0.75</sub> Co <sub>0.25</sub> Se                          | Colorimetric     | 5-200000                    | /                                                    | 2                     | 17         |
| MXene/CMCS@HRP/PET                                                | Electrochemistry | 0.5-40000                   | 56.45                                                | 0.29                  | This work  |

## Reference

- 1 X. Su, Q. You, L. Zhuang, Z. Chang, M. Ge, L. Yang and W.-F. Dong, *J. Pharm. Biomed. Anal.*, 2023, **234**, 115479.
- 2 A. Silvestri, S. Vázquez - Díaz, G. Misia, F. Poletti, R. López - Domene, V. Pavlov, C. Zanardi, A. L. Cortajarena and M. Prato, *Small*, 2023, DOI: 10.1002/smll.202300163, 2300163.
- 3 Y. Ye, X. Sun, Y. Zhang, X. Han and X. Sun, *Biosens. Bioelectron.*, 2022, **202**, 113990.
- 4 Y. Sun, X. Dong, H. He, Y. Zhang, K. Chi, Y. Xu, M. Asif, X. Yang, W. He, K. Liao and F. Xiao, *NPG Asia Mater.*, 2023, **15**, 2.
- 5 L. Zhang, Y. Wang, Y. Wang, M. Guo, Z. Li, X. Jin and H. Du, *Talanta*, 2023, **261**, 124600.
- 6 J. Lu, Y. Hu, P. Wang, P. Liu, Z. Chen and D. Sun, *Sens. Actuators B Chem.*, 2020, **311**, 127909.
- 7 K. Wang, Y. Sun, W. Xu, W. Zhang, F. Zhang, Y. Qi, Y. Zhang, Q. Zhou, B. Dong, C. Li, L. Wang and L. Xu, *Sens. Actuators B Chem.*, 2022, **355**, 131298.
- 8 B. Patella, M. Buscetta, S. Di Vincenzo, M. Ferraro, G. Aiello, C. Sunseri, E. Pace, R. Inguanta and C. Cipollina, *Sens. Actuators B Chem.*, 2021, **327**, 128901.
- 9 S. Lee, Y. J. Lee, J. H. Kim and G.-J. Lee, *Chemosensors*, 2020, **8**, 63.
- 10 B. Patella, S. D. Vincenzo, C. Zanca, L. Bollaci, M. Ferraro, M. R. Giuffrè, C. Cipollina, M. G. Bruno, G. Aiello, M. Russo, R. Inguanta and E. Pace, *Micromachines*, 2022, **13**, 1762.
- 11 P. Miao, B. Wang, J. Yin, X. Chen and Y. Tang, *Electrochem. Commun.*, 2015, **53**, 37-40.
- 12 X. Zhu, H. Li, S. Hou, P. Song, J. Zheng, T. Wu, H. Zhao and Q. Liu, *Chem. Eng. J.*, 2024, **482**, 148589.
- 13 R. Sun, J. Chen, W. Zhang, Y. Huang, J. Zheng and Y. Chi, *Anal. Chem.*, 2023, **95**, 11475-11482.
- 14 S. Ma, C. Wei, Y. Bao, Y. Liu, H. Jiang, W. Tong, D. Chen and X. Huang, *Microchim. Acta*, 2024, **191**, 1-12.
- 15 S. R. Ahmed, A. G. Cardoso, H. V. Cobas, P. Das, A. Chen, S. Srinivasan and A. R. Rajabzadeh, *ACS Appl. Nano Mater.*, 2023, **6**, 8434-8443.
- 16 Z. Xu, C. Zeng, Y. Zhao, M. Zhou, T. Lv, C. Song, T. Qin, L. Wang, B. Liu and X. Peng, *Food Chem.*, 2023, **410**, 135381.
- 17 M. Lian, F. Shi, Q. Cao, C. Wang, N. Li, X. Li, X. Zhang and D. Chen, *Spectrochim. Acta A Mol. Biomol. Spectrosc.*, 2024, **311**, 124038.
